# Supplementary material
Source: HighWire-hosted journal article supplement (https://cmaj.ca/highwire/filestream/59139/field_highwire_adjunct_files/0/validity-alonso-1-at.pdf)

**Appendix 1: Decision algorithm to identify relevant and key references**

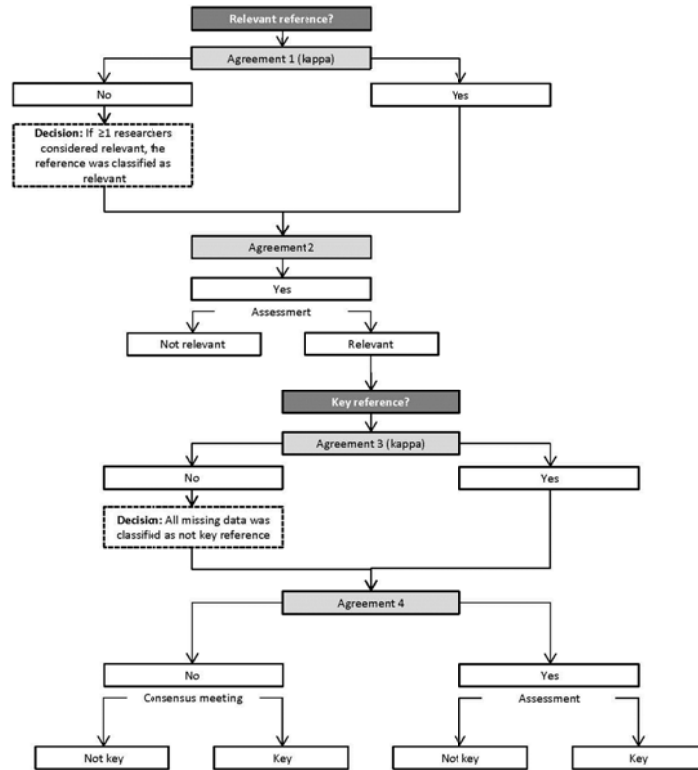

Supplement: validity-alonso-1-at.pdf [file validity-alonso-1-at.pdf]
